# Supplementary material for: Monitoring the Microseismicity through a Dense Seismic Array and a Similarity Search Detection Technique: Application to the Seismic Monitoring of Collalto Gas-Storage, North Italy
Source: MDPI journal article supplement (doi:10.3390/en15103504), 2022-05-11
Supplement: s1 [file s1]

Archive with 1 entries (1 files):
- energies-1674895-supplementary.pdf
